# Supplementary material for: Difunctional Zn-based metal–organic frameworks: chemical conversion of CO2 and luminescence recognition for secnidazole
Source: Royal Society of Chemistry journal article supplement (doi:10.1039/d2tc03344e), 2022-01-01
Supplement: d2tc03344e1.pdf [file d2tc03344e1.pdf]

***Supplementary Materials:***

**Difunctional Zn-Based Metal-Organic Frameworks: Chemical  
Conversion of CO<sub>2</sub> and Luminescent Recognition for Secnidazole**

Xiaomin Kang,<sup>\* a,b</sup> Zhuohao Jiao,<sup>b</sup> Xinlei Shi,<sup>a</sup> Yadong Tian<sup>a</sup> and Zhiliang Liu<sup>\*a</sup>

<sup>a</sup>*Inner Mongolia Key Laboratory of Chemistry and Physics of Rare Earth Materials, College of  
Chemistry and Chemical Engineering, Inner Mongolia University, Hohhot, 010021, PR China.*

<sup>b</sup>*Key Laboratory of Advanced Energy Materials Chemistry (Ministry of Education), College of  
Chemistry, Nankai University, Tianjin 300071, China.*

E-mail: kangxm@imu.edu.cn, E-mail: cezliu@imu.edu.cn

**Table S1** crystal data and structure refinement for compound **1**.

|                                                      | <b>1</b>                                                           |
|------------------------------------------------------|--------------------------------------------------------------------|
| Empirical formula                                    | C <sub>26</sub> H <sub>35</sub> N <sub>7</sub> O <sub>7</sub> Zn   |
| Formula weight                                       | 618.71                                                             |
| Temperature/K                                        | 123.0(3)                                                           |
| Crystal system                                       | Trigonal                                                           |
| Space group                                          | <i>R</i> -3                                                        |
| <i>a</i> /Å                                          | 31.4046(18)                                                        |
| <i>b</i> /Å                                          | 31.4046(18)                                                        |
| <i>c</i> /Å                                          | 14.9137(8)                                                         |
| $\alpha$ /°                                          | 90                                                                 |
| $\beta$ /°                                           | 90                                                                 |
| $\gamma$ /°                                          | 120                                                                |
| <i>V</i> , Å <sup>3</sup>                            | 12738.0(16)                                                        |
| <i>Z</i>                                             | 18                                                                 |
| $\rho_{\text{calc}}$ /cm <sup>3</sup>                | 1.032                                                              |
| $\mu$ /mm <sup>-1</sup>                              | 0.892                                                              |
| <i>F</i> (000)                                       | 5868.0                                                             |
| 2 $\theta$ range for data collection/°               | 6.2325 to 50.014                                                   |
| Reflections collected                                | 8818                                                               |
| <i>R</i> <sub>int</sub>                              | 0.0315                                                             |
| Goodness-of-fit<br>on <i>F</i> <sup>2</sup>          | 1.038                                                              |
| Final <i>R</i> indexes [ <i>I</i> ≥ 2σ ( <i>I</i> )] | <i>R</i> <sub>1</sub> = 0.0398,<br><i>wR</i> <sub>2</sub> = 0.0902 |
| Final <i>R</i> indexes [all data]                    | <i>R</i> <sub>1</sub> = 0.0557,<br><i>wR</i> <sub>2</sub> = 0.0987 |
| $\Delta\rho$ max/min (e Å <sup>-3</sup> )            | 0.382/-0.281                                                       |

**Table S2** Selected bond lengths (Å) and bond angles (°) for compound **1**.

|                       |            |                     |            |
|-----------------------|------------|---------------------|------------|
| <i>Bond distances</i> |            |                     |            |
| Zn(1)-O(4)            | 1.944(2)   | C(11)-C(10)#3       | 1.397(4)   |
| Zn(1)-O(1)            | 1.950(2)   | C(8)-C(9)#4         | 1.397(4)   |
| Zn(1)-N(4)#1          | 1.998(2)   | C(10)-C(11)#5       | 1.397(4)   |
| Zn(1)-N(1)            | 2.000(2)   | C(9)-C(8)#6         | 1.397(4)   |
| N(4)-Zn(1)#2          | 1.998(2)   |                     |            |
| <i>Bond Angles</i>    |            |                     |            |
| O(4)-Zn(1)-O(1)       | 137.80(10) | N(3)-N(4)-Zn(1)#2   | 123.01(18) |
| O(4)-Zn(1)-N(4)#1     | 109.02(9)  | C(10)-C(11)-C(10)#3 | 118.4(3)   |
| O(4)-Zn(1)-N(1)       | 98.21(9)   | C(9)-C(8)-C(9)#4    | 118.2(3)   |
| O(1)-Zn(1)-N(4)#1     | 97.08(9)   | C(11)-C(10)-C(11)#5 | 121.5(3)   |
| O(1)-Zn(1)-N(1)       | 105.20(9)  | C(8)-C(9)-C(8)#6    | 121.8(3)   |
| N(4)#1-Zn(1)-N(1)     | 107.11(10) |                     |            |

Symmetry transformations used to generate equivalent atoms:

#1 -x+y+1/3, -x+2/3, z-1/3      #2 -y+2/3, x-y+1/3, z+1/3

#3 -x+y, -x+1, z      #4 -y+1, x-y, z      #5 -y+1, x-y+1, z

#6 -x+y+1, -x+1, z

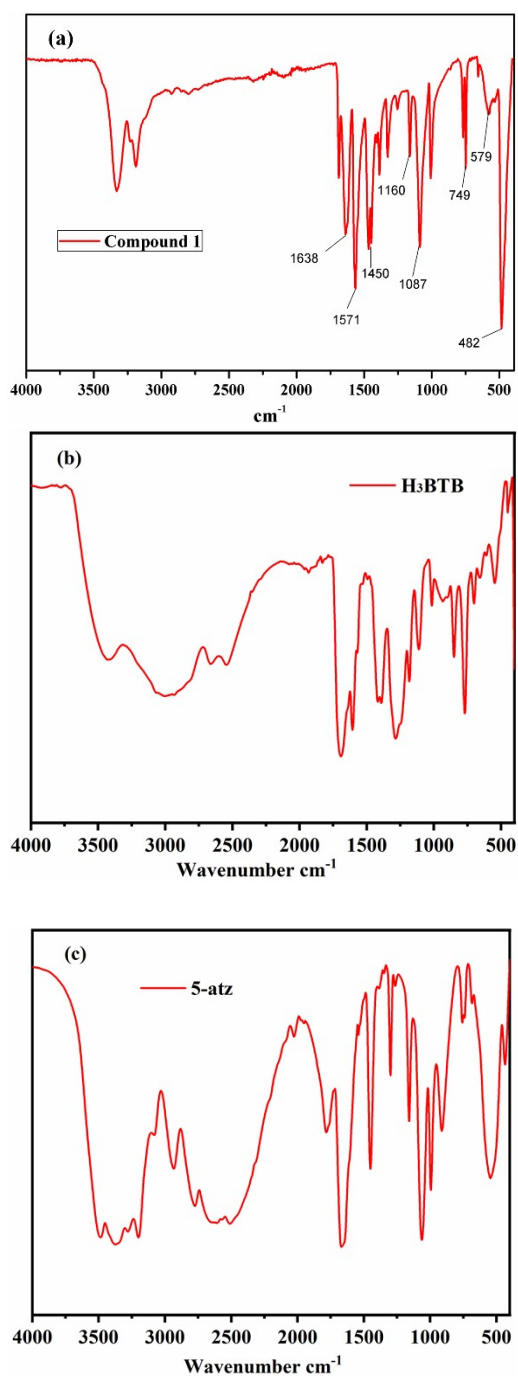

**Fig. S1** The FT-IR spectrum of compound **1** (a), H<sub>3</sub>BTB (b) and 5-atz (c). Some main IR (cm<sup>-1</sup>) of compound **1**: 1638 (vs), 1571 (vs), 1450 (s), 1160 (m), 1087 (vs), 749 (s), 579 (w), 482 (vs).

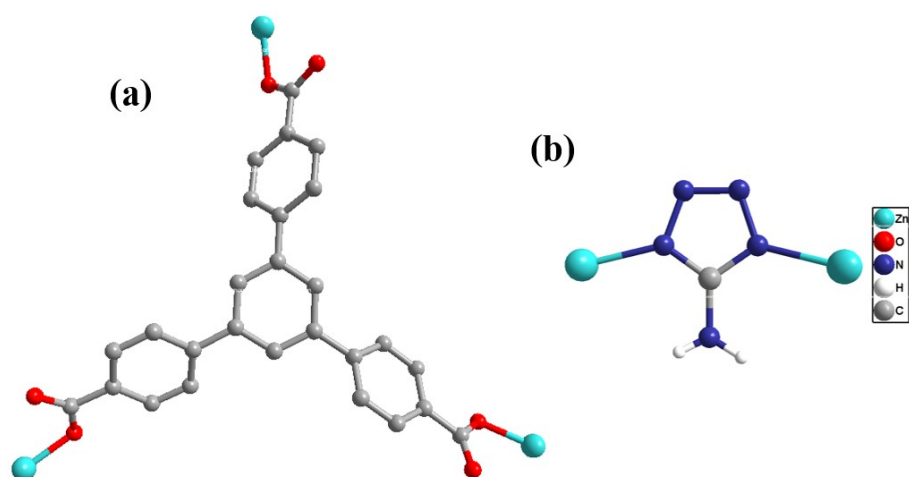

**Fig. S2** The coordination modes of organic ligands: (a) for H<sub>3</sub>BTB and (b) for 5-atz.

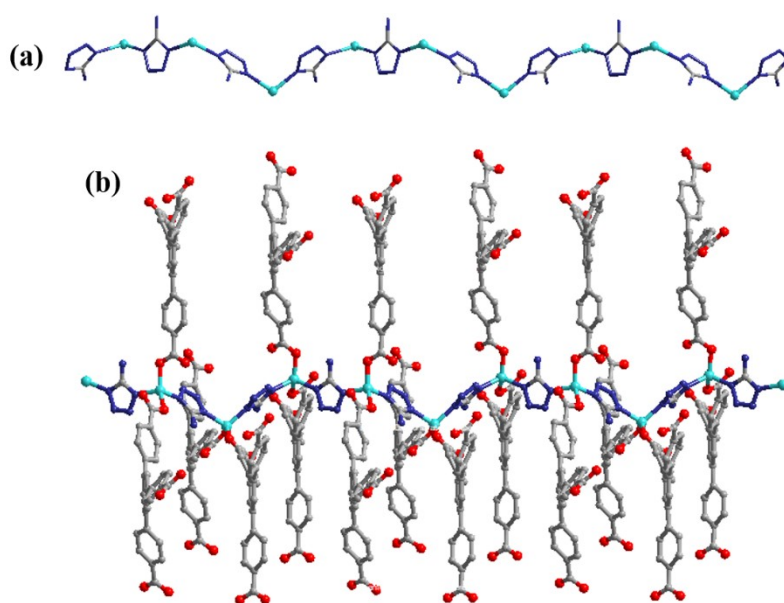

**Fig. S3** (a) The zigzag type 1D chains made from Zn<sup>2+</sup> ions and 5-atz ligands. (b) The 3D pillar-chain structure built from 1D chains and H<sub>3</sub>BTB ligands.

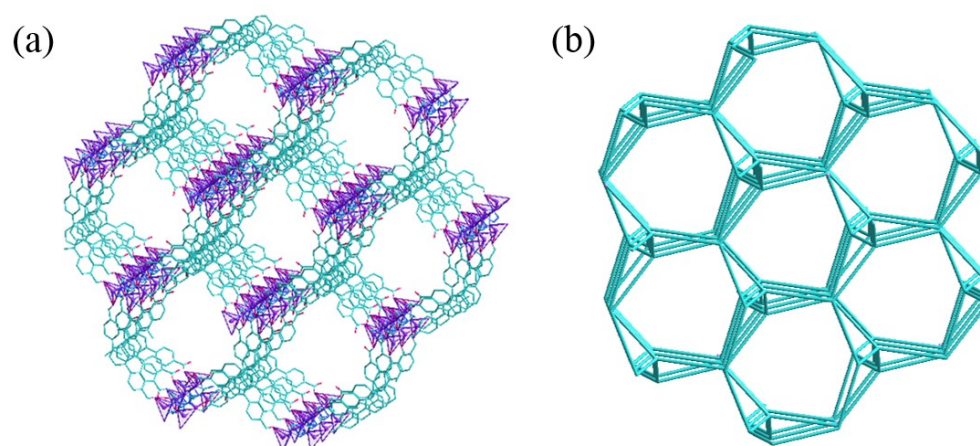

**Fig. S4** (a) A set of 3D interpenetrating framework of **1** and (b) its corresponding topological network.

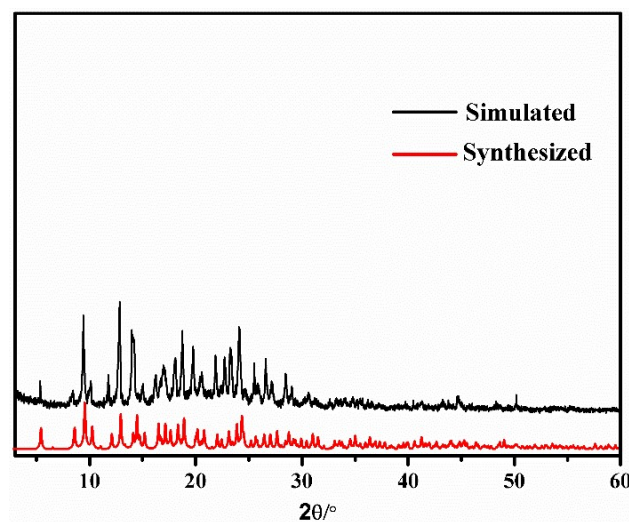

**Fig. S5** The PXRD patterns of the simulated and synthesized samples for compound **1**.

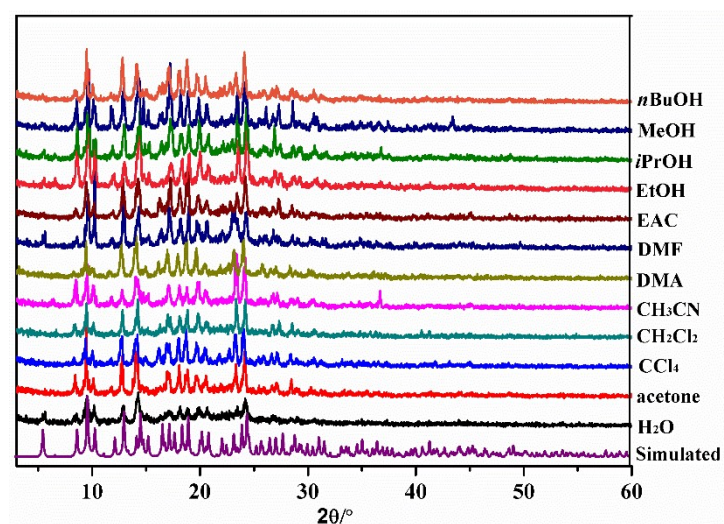

**Fig. S6** The PXRD patterns for compound **1** immersing in various common solvents.

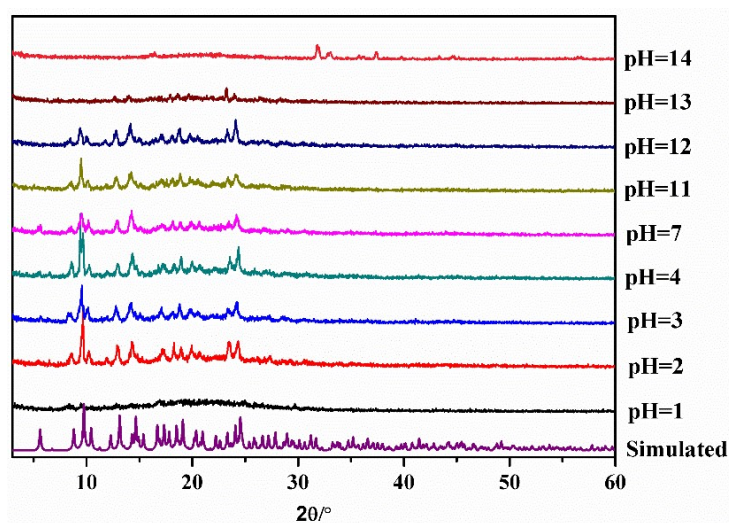

**Fig. S7** The PXRD patterns for compound **1** in various solutions from pH 2 to 13.

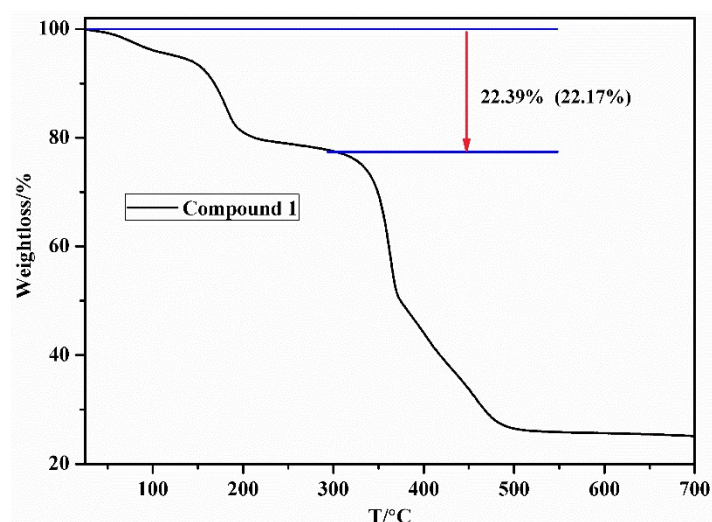

**Fig. S8** TG curve for compound **1**.

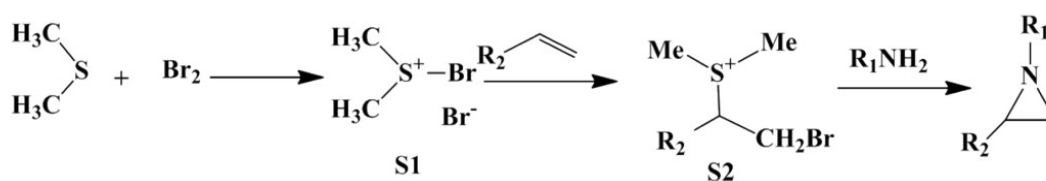

**Scheme 1** Preparation of aziridines.

Typical procedure for the synthesis of aziridines was described as following (**Scheme S1**): Firstly, bromine (0.2 mol, 32.0 g) in dry  $\text{CH}_2\text{Cl}_2$  (40 mL) was slowly dropped over 30 min to 40 mL  $\text{CH}_2\text{Cl}_2$  solution of dimethyl sulfide (0.2 mol, 12.4 g) in ice-salt baths. Light orange crystals of bromodimethyl sulfonium bromide gradually generated during the process, and the orange crystals **S1** were completely obtained and collected by filtration. Yield: 80%.

Secondly, olefin (160 mmol) was slowly dropped to 160 mL  $\text{CH}_3\text{CN}$  solution of **S1** (160 mmol, 35.56 g) in ice-salt baths. The solution was stirred for 2h after the addition of olefin was completed. The white solid **S2** gradually generated during the process. The crystals **S2** was collected by filtration, dried under vacuum. Yield: 30-38.6 %.



Thirdly, a solution of amine (20-50 mmol) was slowly added into a stirred solution of compound **S2** (10 mmol) in 20 mL water at r.t., and the resulting mixture was stirred overnight. Then the mixture was slowly dropped into 20 mL of saturated brine, extracted with diethyl ether (3×20 mL), dried with anhydrous Na<sub>2</sub>SO<sub>4</sub> overnight and the solvent evaporated under reduced pressure. Aziridines were obtained by distillation under reduced pressure. Yield: 85-100 %.

**Table S3** The ICP result of compound **1** after catalytic recycling (filter liquor).

|                                                                 |                                       |
|-----------------------------------------------------------------|---------------------------------------|
|                                                                 | Compound <b>1</b> (Zn <sup>2+</sup> ) |
| after catalytic recycling<br>(M <sup>2+</sup> of filter liquor) | 0.25%                                 |

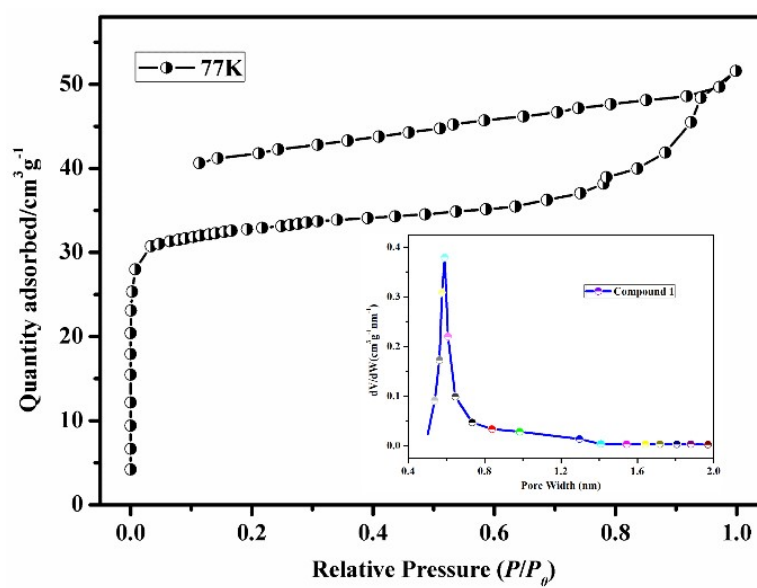

**Fig. S9** The N<sub>2</sub> adsorption of compound **1** at 77 K and pore size distribution.

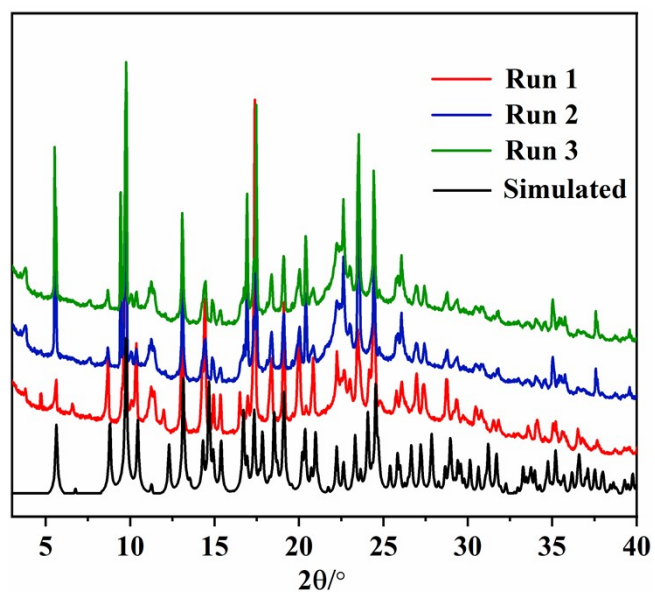

**Fig. S10** The PXRD patterns of recycled **1** after five catalytic recycles.

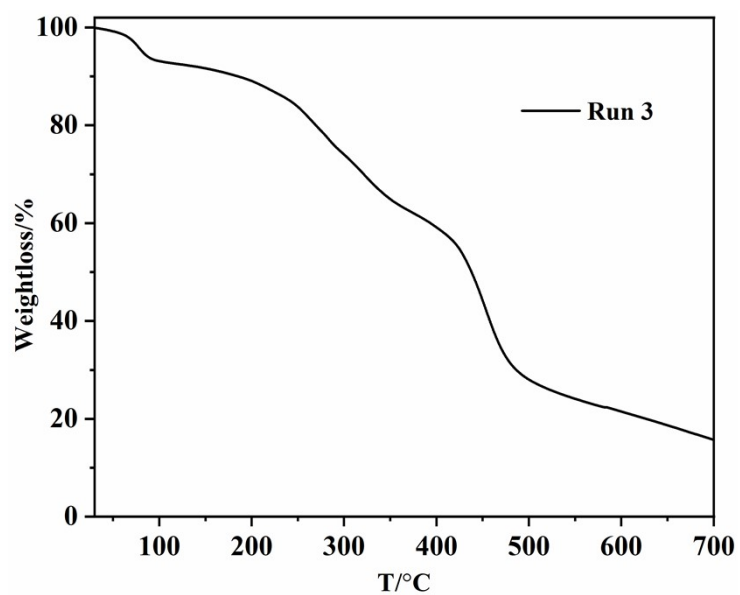

**Fig. S11** The TG curve of compound **1** after five catalytic recycling in  $\text{CO}_2$  cycloaddition is unchanged in comparison with the one of synthesized **1**.

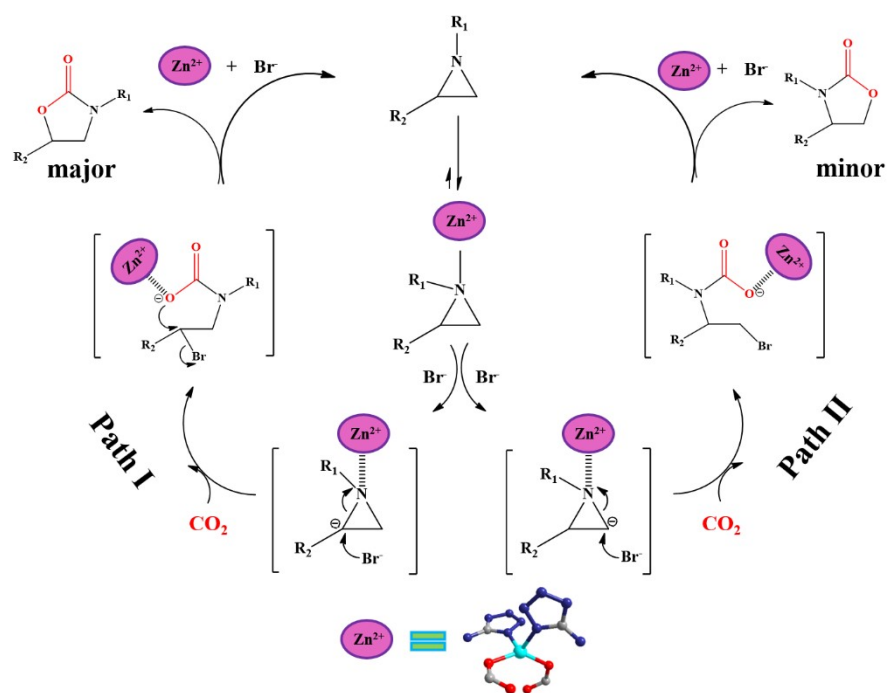

**Fig. S12** The possible mechanism for the cycloaddition of aziridine with CO<sub>2</sub> into oxazolidinone.

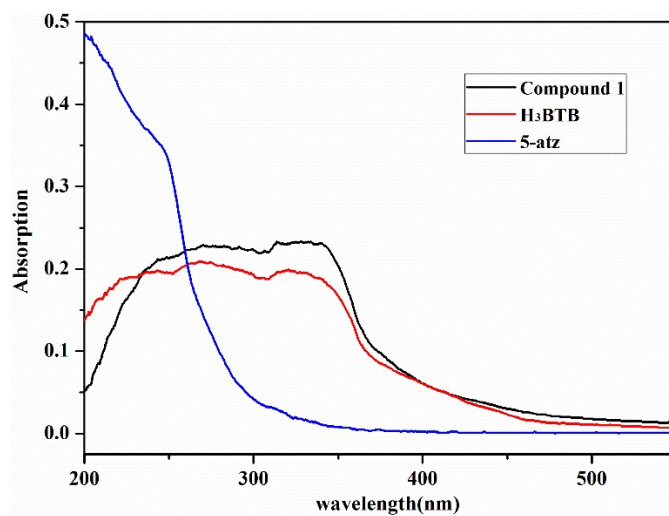

**Fig. S13** The solid-state UV spectra for compound 1 and ligands (H<sub>3</sub>BTB and 5-atz). Black: compound 1; Red: H<sub>3</sub>BTB; Blue: 5-atz.

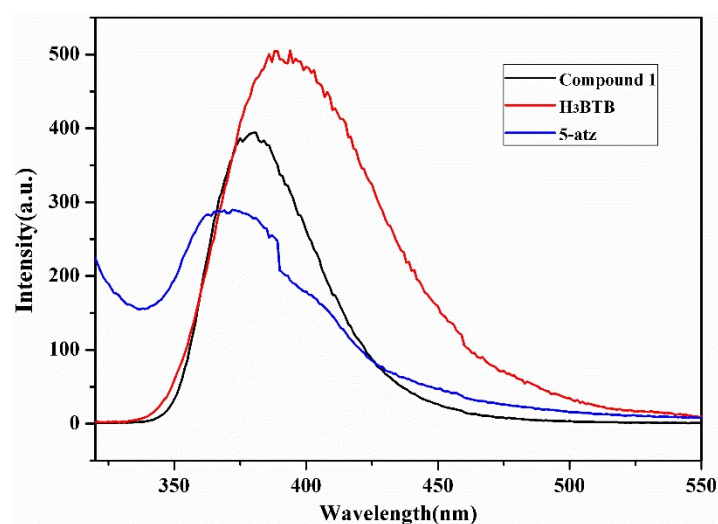

**Fig. S14** The solid-state photoluminescence spectra for compound **1** and ligands ( $H_3BTB$  and 5-atz). Black: compound **1**; Red:  $H_3BTB$ ; Blue: 5-atz.

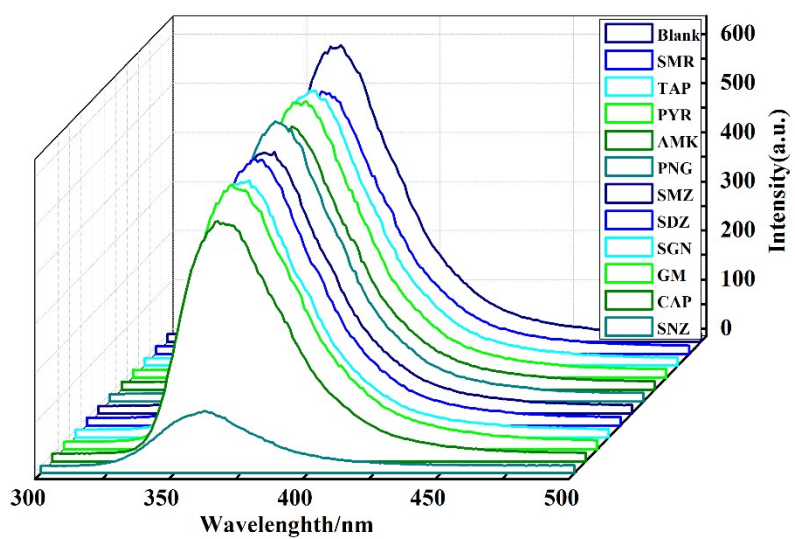

**Fig. S15** The luminescence spectra of **1** after adding various antibiotics.

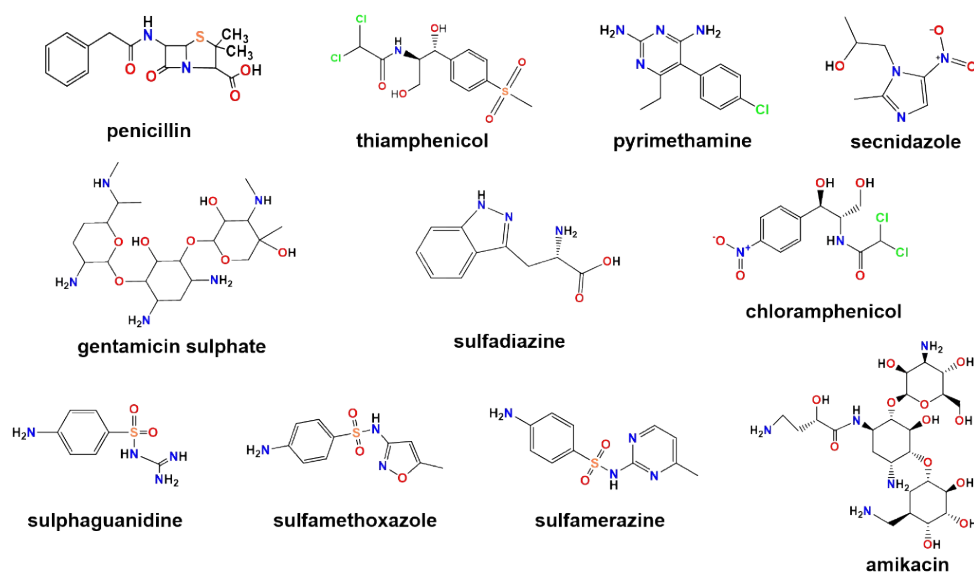

**Scheme S2** The structures of various antibiotic molecules.

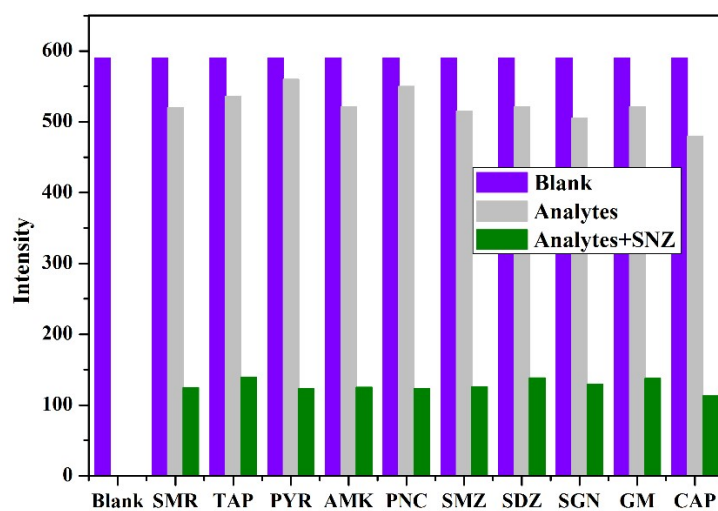

**Fig. S16** Luminescent response of compound **1** towards the other competing antibiotics (500 ppm) or a mixture of competing antibiotics (500 ppm) and target analyte (SNZ, 250 ppm).

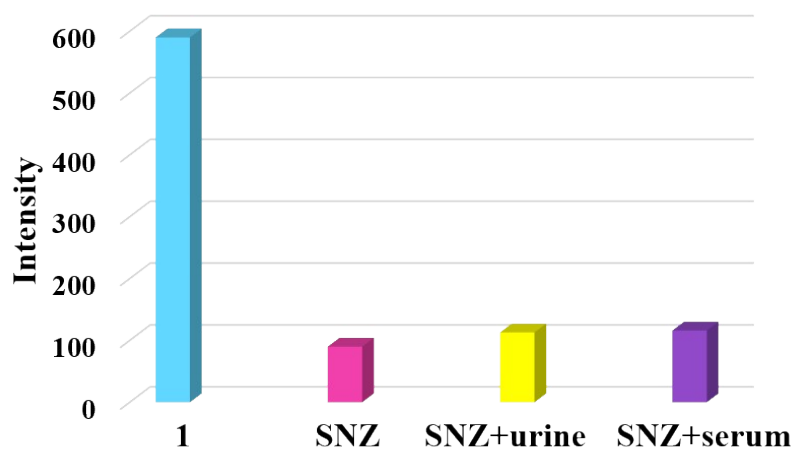

**Fig. S17** Luminescent response of compound **1** towards SNZ (500 ppm) or a mixture of SNZ and urine/serum (500 ppm).

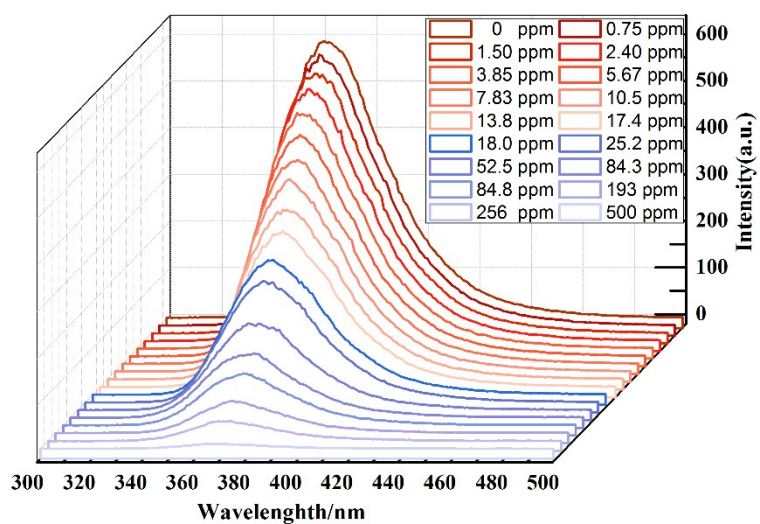

**Fig. S18** Emission spectra of compound **1** dispersed in different concentrations of secnidazole solutions.

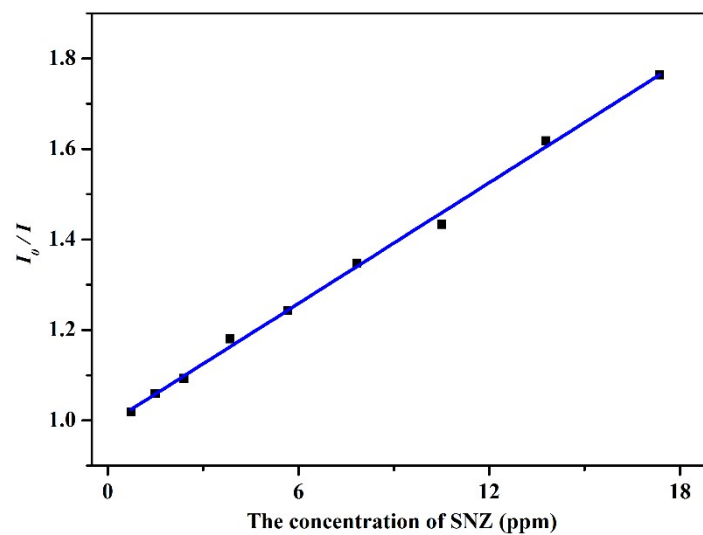

**Fig. S19** Relative luminescence intensity ( $I_0/I$ ) vs the concentration of SNZ antibiotic plot.

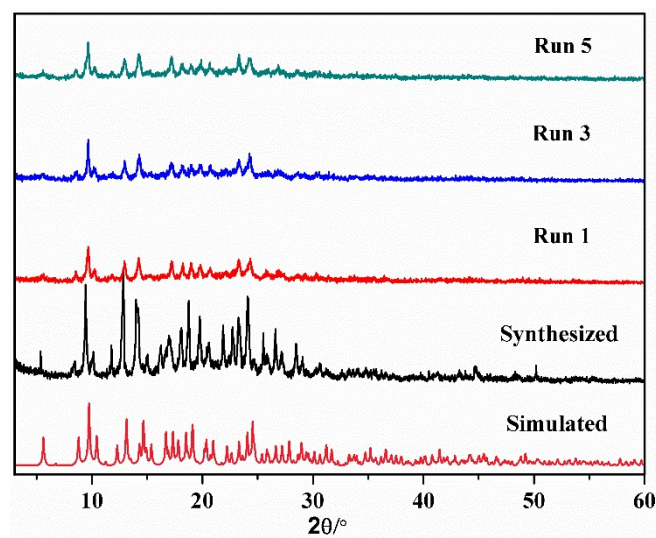

**Fig. S20** The PXRD patterns of compound **1** after luminescent recycling agree well with the synthesized and simulated ones.

**Table S4** The ICP result of reaction mixture filtrate after five recycles for sensing SNZ.

| filter liquor                       | The leakage of Zn <sup>2+</sup> |
|-------------------------------------|---------------------------------|
| After five recycles for sensing SNZ | 0.056%                          |

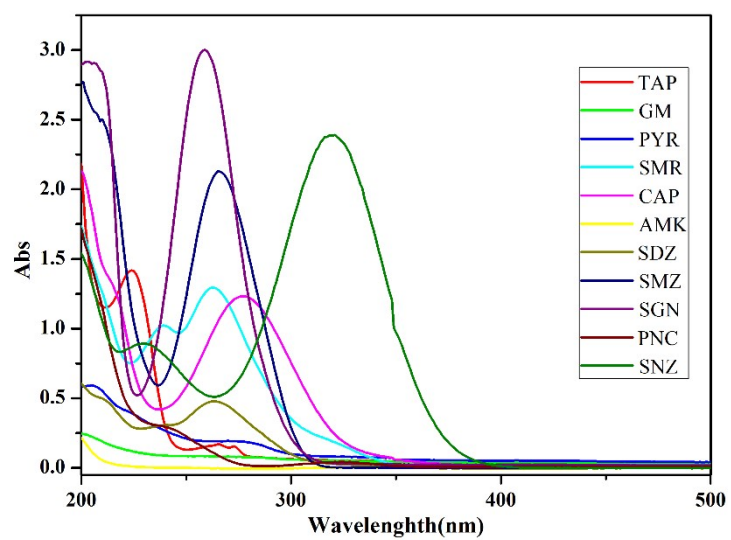

**Fig. S21** UV/Vis absorption spectra of different antibiotics. Concentrations: 45 ppm.
